# Supplementary material
Source: PubMed Central journal article supplement (PMC2947549)

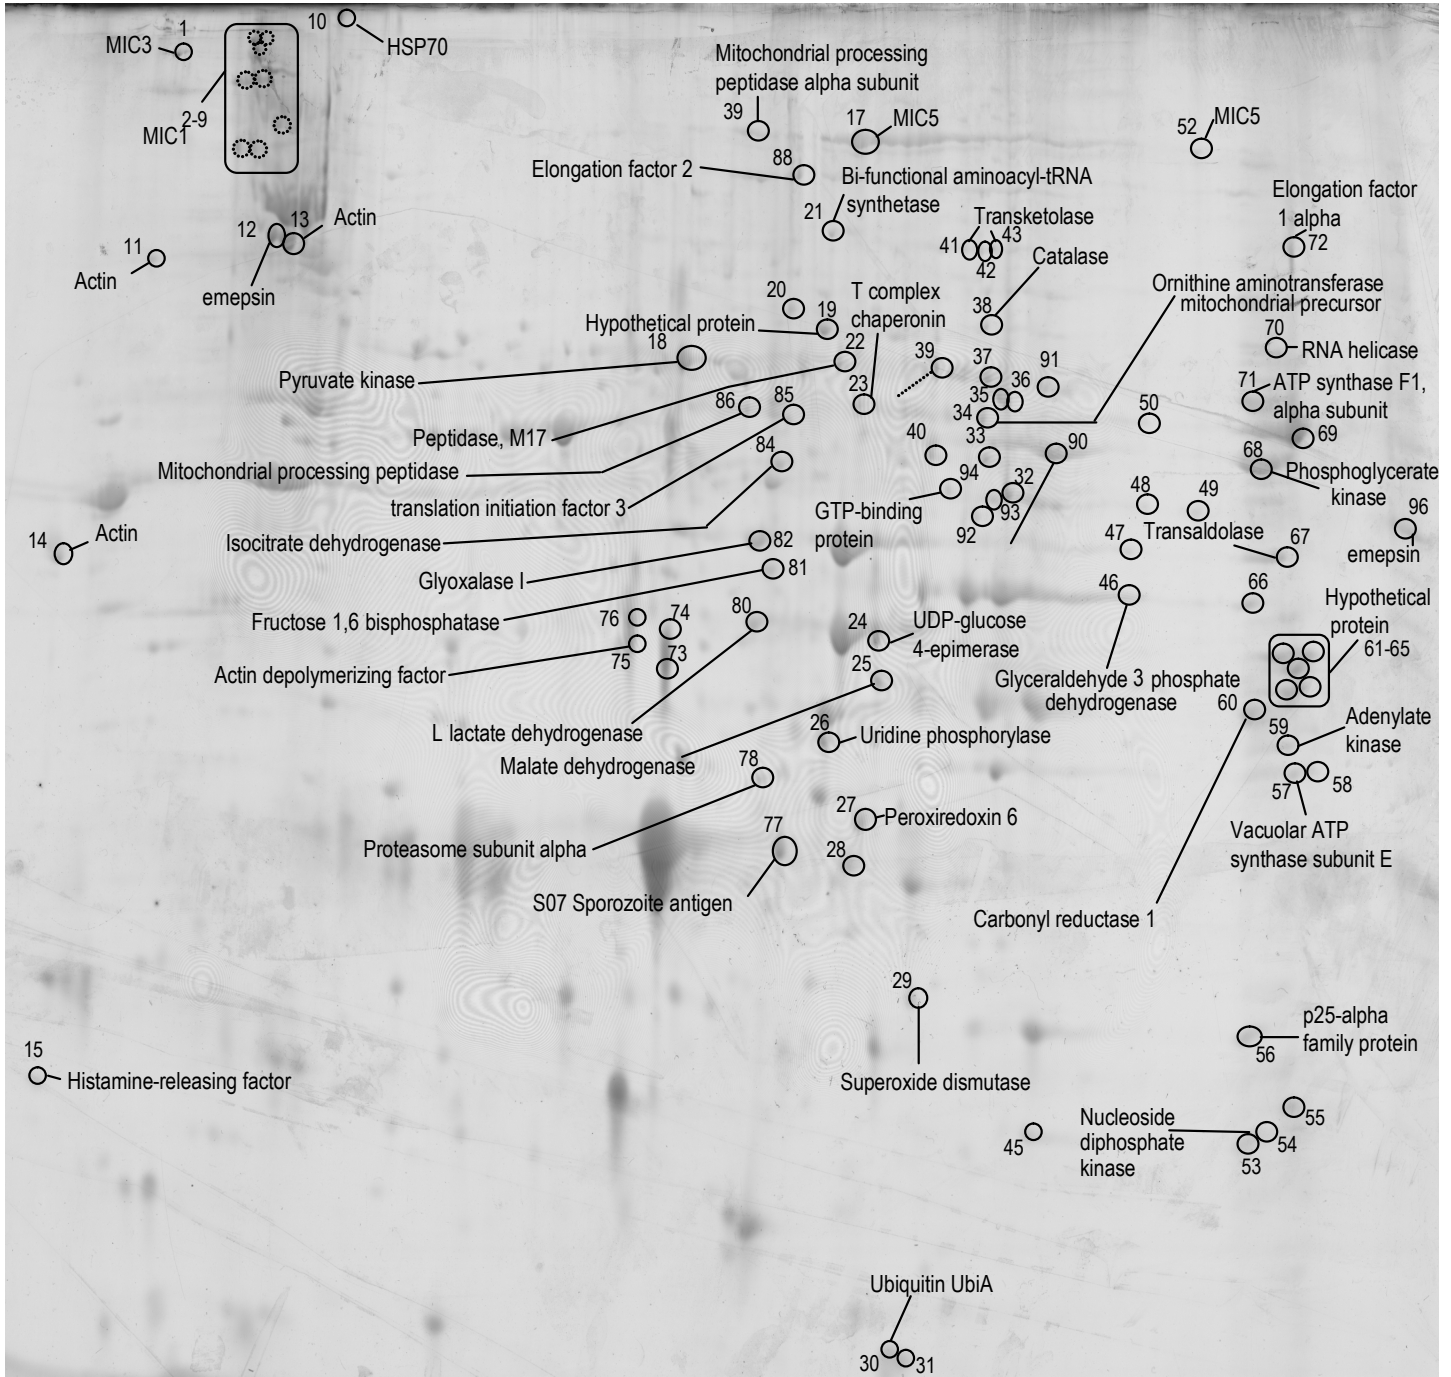

Supplement: NIHMS234557-supplement-Fig_S2.pdf [file NIHMS234557-supplement-Fig_S2.pdf]

S4

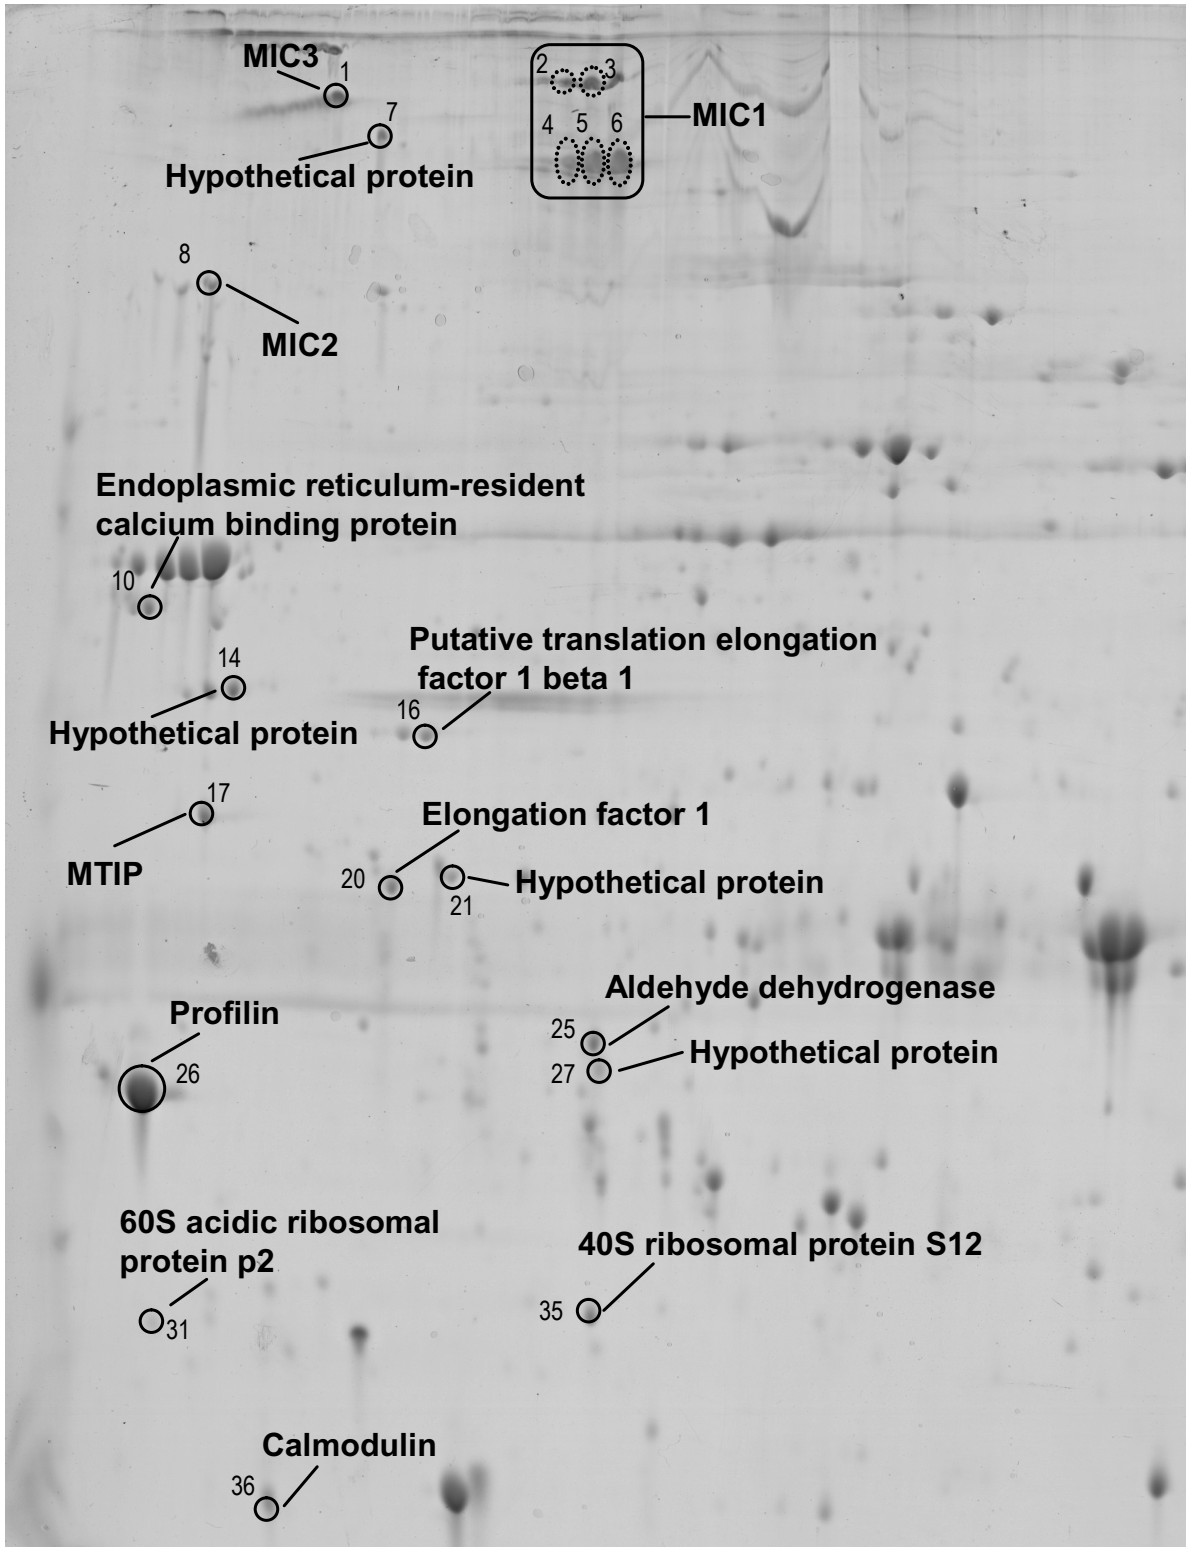

Supplement: NIHMS234557-supplement-Fig_S4.pdf [file NIHMS234557-supplement-Fig_S4.pdf]

## Protein diversity in metabolism

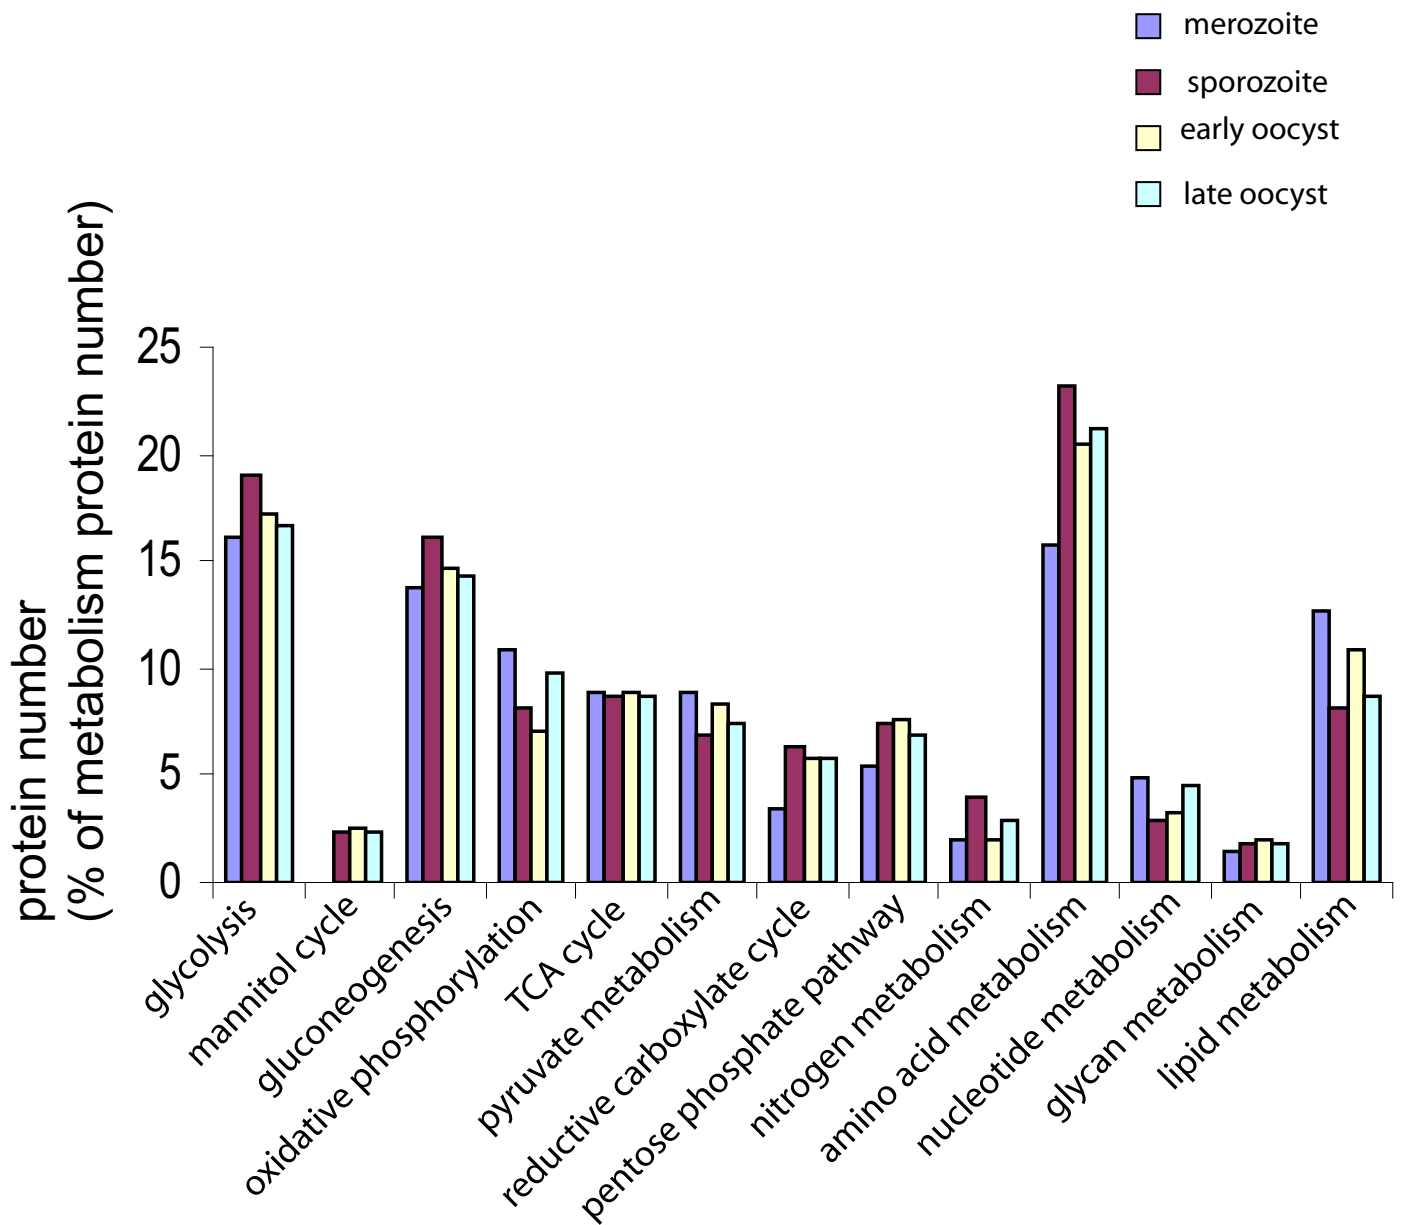

Supplement: NIHMS234557-supplement-Fig_S5.pdf [file NIHMS234557-supplement-Fig_S5.pdf]

## Predicted intracellular locations

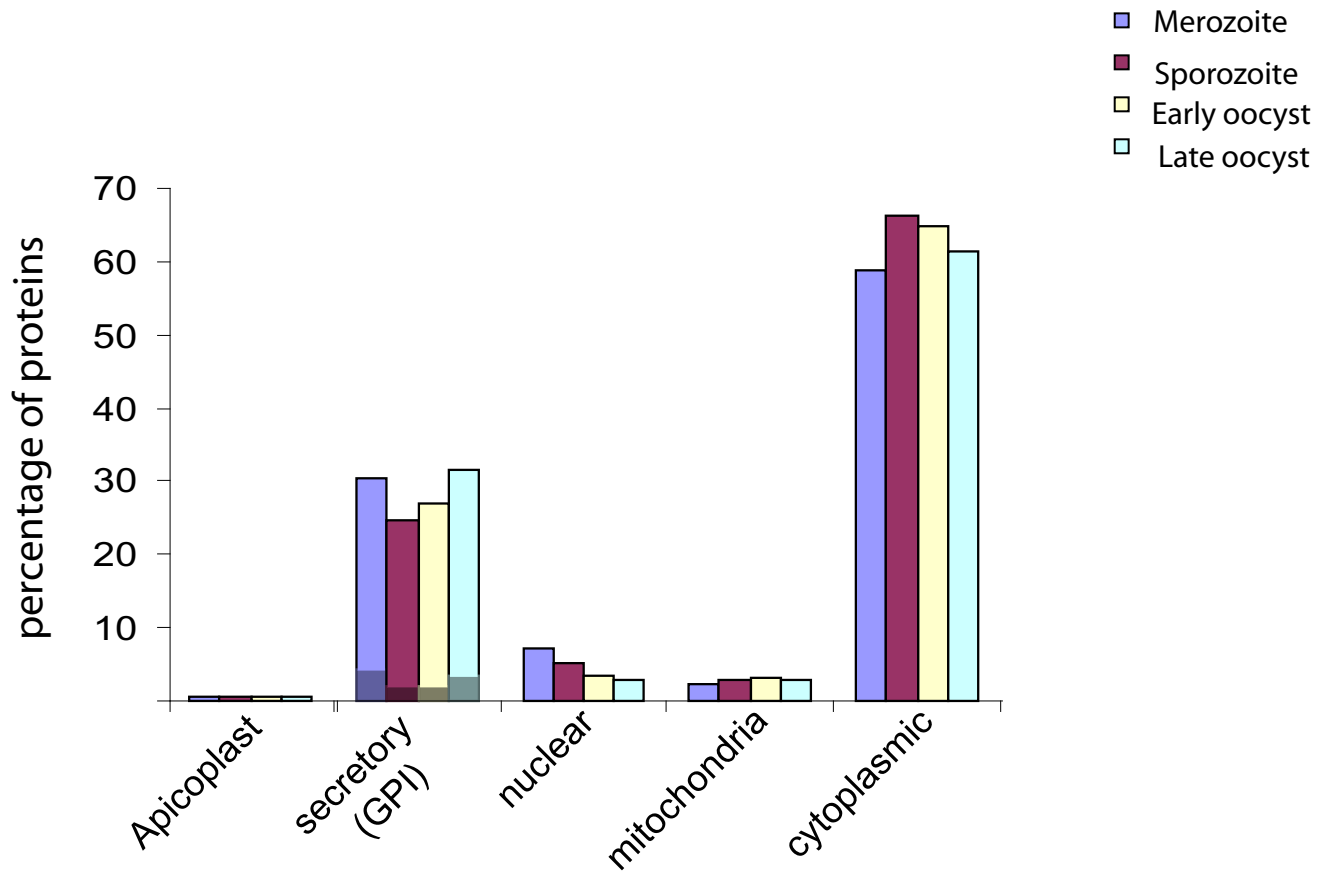

Supplement: NIHMS234557-supplement-Fig_S6.pdf [file NIHMS234557-supplement-Fig_S6.pdf]
